# Supplementary material for: Effect of kaolinite edge surfaces on formation of Tb3+-doped phosphor by solid-state reaction
Source: PubMed Central journal article supplement (PMC9121353; doi:10.1039/d2ra02199d), 2022-05-20
Supplement: RA-012-D2RA02199D-s001.pdf [file RA-012-D2RA02199D-s001.pdf]

Electronic Supporting Information

# Effect of kaolinite edge surfaces on formation of Tb<sup>3+</sup>-doped phosphor by solid-state reaction

*Shingo Machida\**, *Ken-ichi Katsumata*, and *Atsuo Yasumori*

Department of Material Science and Technology, Faculty of Advanced Engineering, Tokyo University of Science,  
6-3-1 Nijuku, Katsushika-ku, Tokyo 125-8585, Japan

\*E-mail: shingo.machida@rs.tus.ac.jp

## Figures

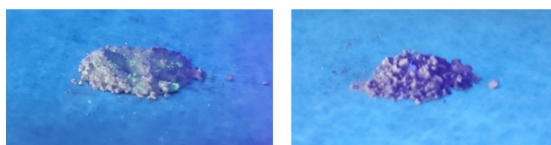

Figure S1. Photograph of the Tb<sup>3+</sup> solution-immersed ground raw materials before and after the acid treatment (left to right).

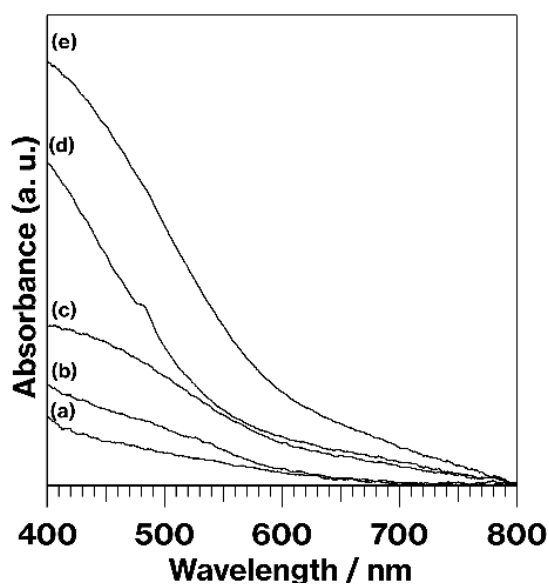

Figure S2. Visible-light spectra of (a) m-CAS, (b) m-CAS-Tb-Edge, (c) m-CAS-Tb-0.075, (d) Tb<sub>2</sub>O<sub>3</sub>, and (e) m-CAS-Tb-0.3.

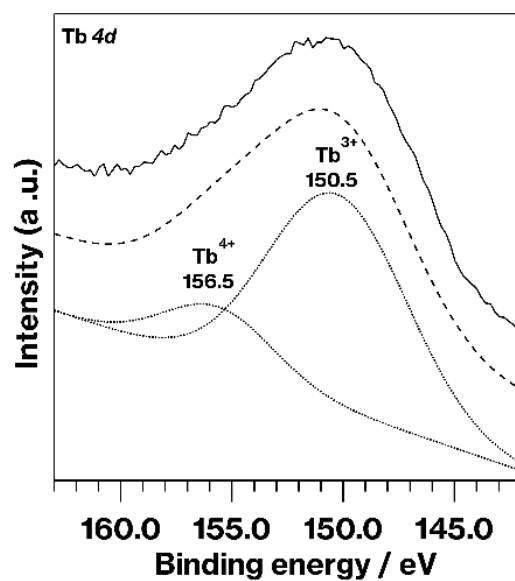

Figure S3. XPS spectrum of  $\text{Tb}_2\text{O}_3$  (solid line). Dotted lines and dashed line are deconvolutional components and simulation spectrum, respectively.

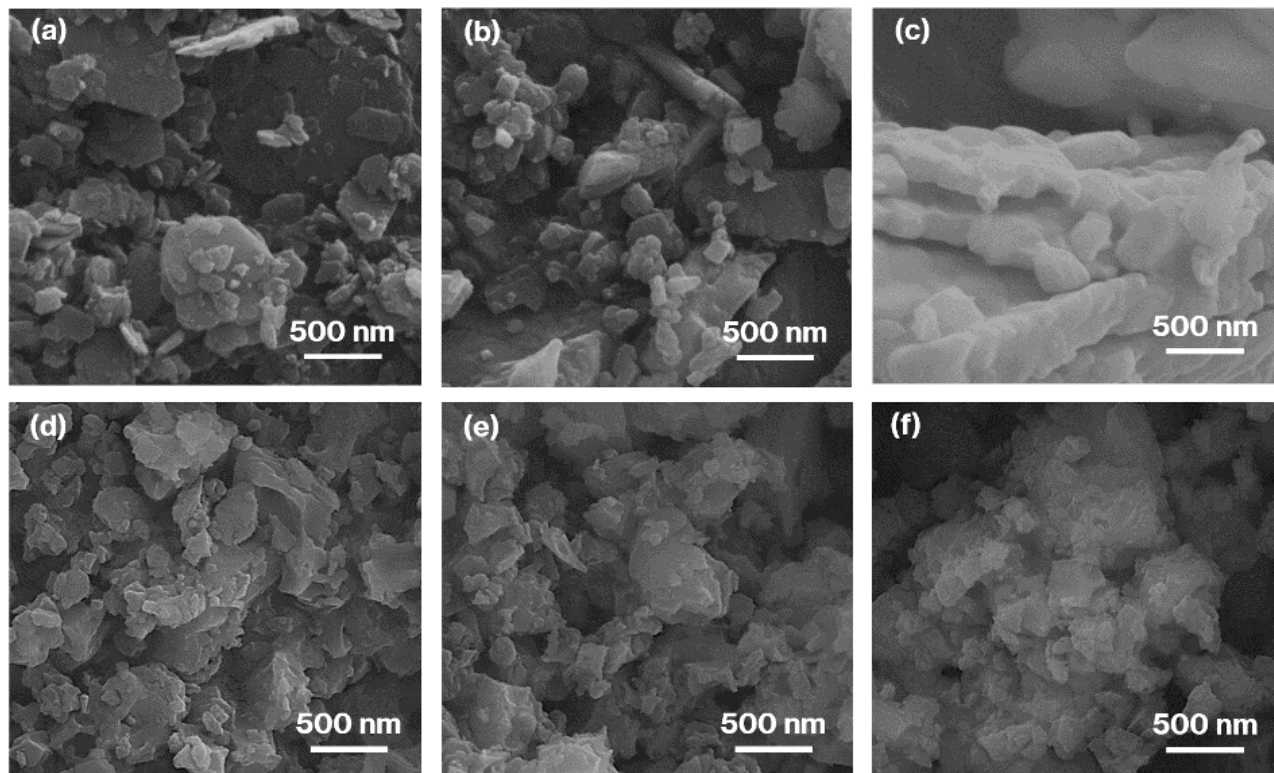

Figure S4. FE-SEM images of (a) Ex-Kaol, (b)  $\text{CaCO}_3$ , (c)  $\text{Tb}_2\text{O}_3$ , (d) m-CAS, (e) m-CAS-Tb-0.3, and (f) m-CAS-Tb-Edge.

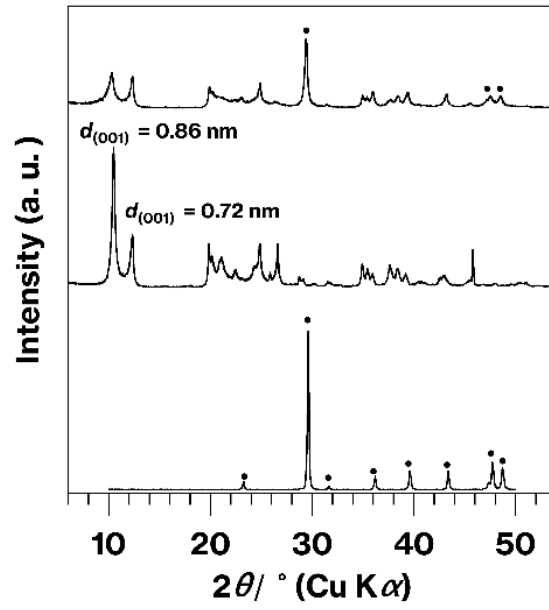

Figure S5. XRD patterns for CaCO<sub>3</sub>, Ex-Kaol, and their ground raw materials (from bottom to top). The filled circles indicate calcite reflections.
